# Supplementary material
Source: Research Square preprint supplement (doi:10.21203/rs.3.rs-8911594/v1)
Supplement: Supplementary file 1 [file 1f58a3e143443a476e8caef2.xlsx]

## Sheet: Characterization Format
Journal: Clean Technologies and Environmental Policy
Article: Why Plastic Policies Fail in Some Areas but Succeed in Others: A Cluster Analysis of Implementation Patterns in a University Campus
Authors: Cristian Curi and Norvin Requena
	Table S3. Plastic Waste Characterization Format (Data Collection Sheet)
	Waste Station ID:
	Period: June 16 - 20
	Solid Waste Quantity Record
	Solid Waste Category	Quantity																														TOTAL (UND)
		2025-06-16					2025-06-17					2025-06-18					2025-06-19					2025-06-20					Total
		Paper	Plast	Recyc	Orga	Gen	Paper	Plast	Recyc	Orga	Gen	Paper	Plast	Recyc	Orga	Gen	Paper	Plast	Recyc	Orga	Gen	Paper	Plast	Recyc	Orga	Gen	Paper	Plast	Recyc	Orga	Gen
	1. Recyclable Waste
	1.1. Plastic Bottles
	Number of water, soda, soft drink, sports drink, or similar bottles
	Number of plastic bottles (breakfast drinks: quinoa, maca, oatmeal, or similar)
	Plastic Food Containers
	2. Non-Recyclable Waste
	2.1. Plastic Straws
	2.2. Single-use Plastic Bags
