# Supplementary material
Source: Research Square preprint supplement (doi:10.21203/rs.3.rs-8911594/v1)
Supplement: Supplementary file 1 [file 7e543baa0dd007d1f2659a8c.docx]

**Journal:** Clean Technologies and Environmental Policy

**Article Title:** Why Plastic Policies Fail in Some Areas but Succeed in Others: A Cluster Analysis of Implementation Patterns in a University Campus

**Authors:** Cristian Curi and Norvin Requena

**Affiliation:** Research Group on Waste for Sustainable Development (GIRDS), Faculty of Environmental Engineering, National University of Engineering, Lima, Peru

**Corresponding Author:** Norvin Requena (nrequenas@uni.edu.pe)

**Supplementary Materials**

| **Fig. S1** Dissemination material used for concessionaire sensitization. | **Fig. S2** Training talks given to administrative staff and concessionaires |
| --- | --- |
| 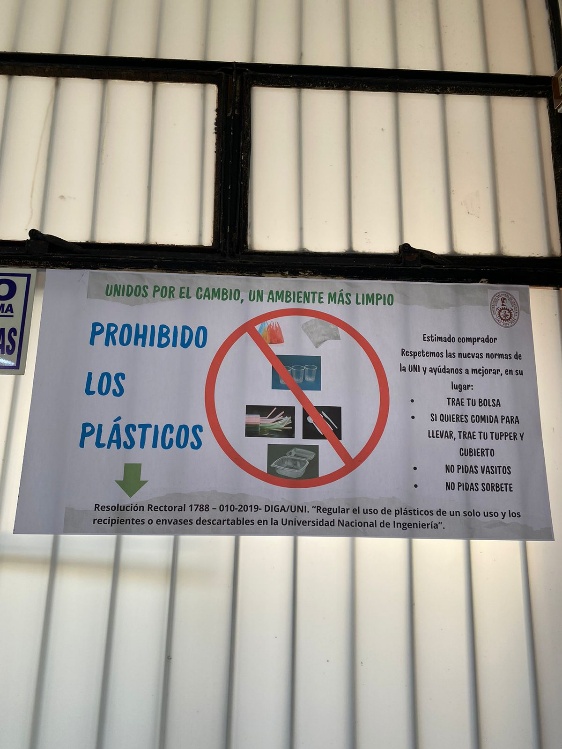 | 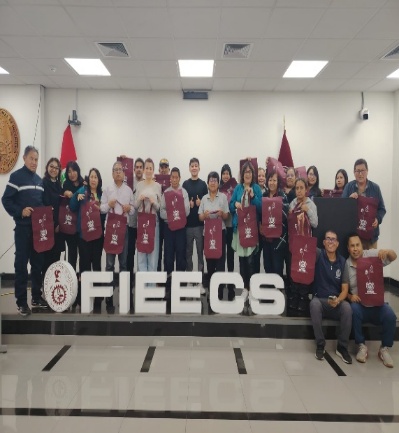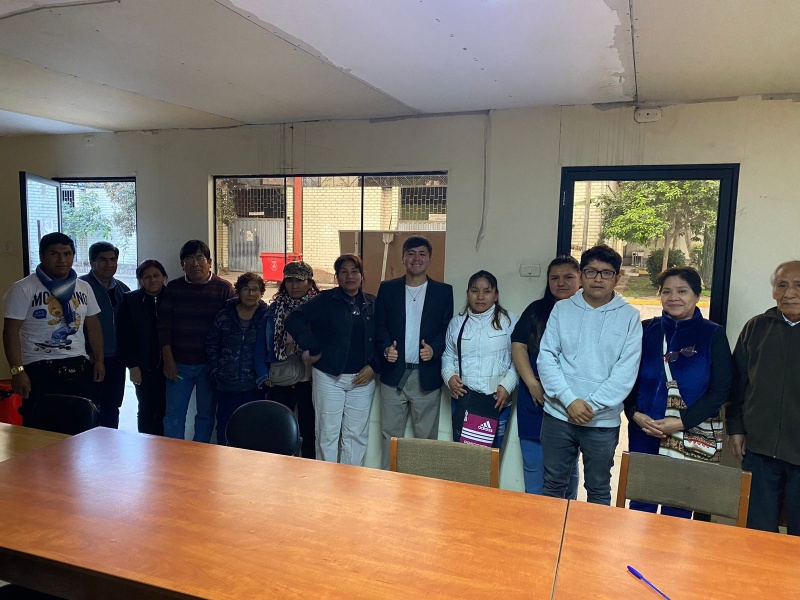 |
| **Fig. S3** Sensitization talk for university students of each faculty. | |
| 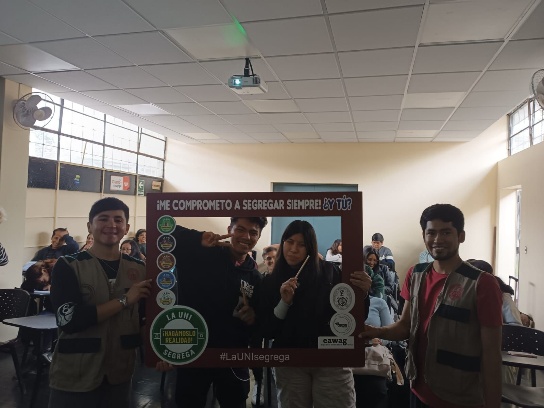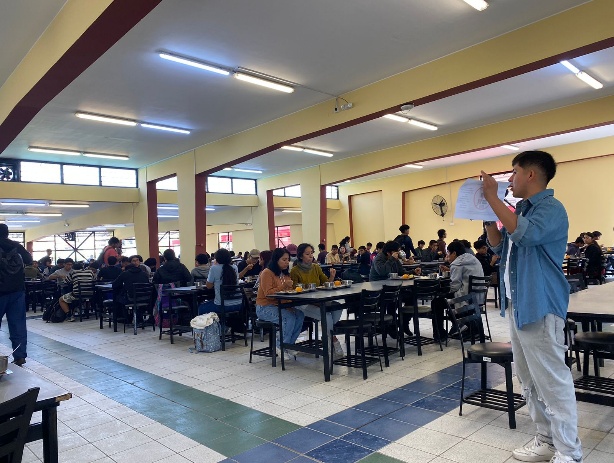 | |
| **Fig. S4** Inspection and control stage for concessionaires | **Fig. S5** Plastic waste characterization carried out on the university campus |
| 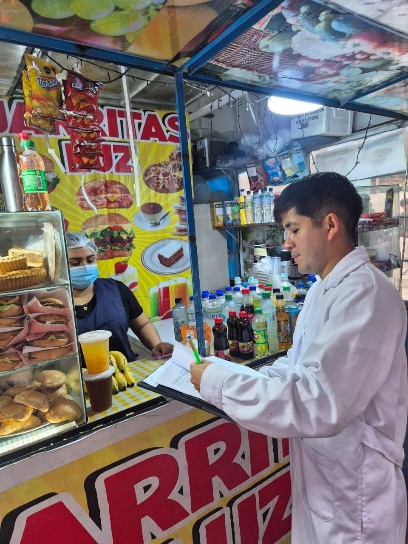 | 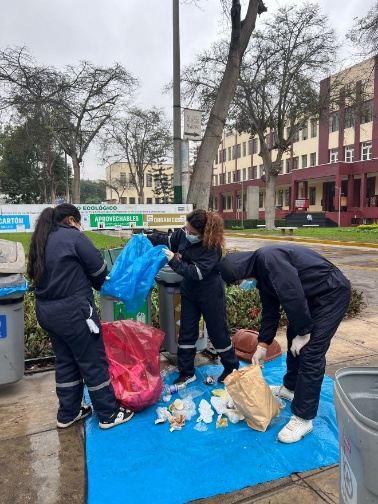 |

Table S1. Inspection Format

| **INSPECTION FORM FOR KIOSKS AND RESTAURANTS** | | | | |
| --- | --- | --- | --- | --- |
| Name of the place |  | | | |
| Owner |  | | | |
| Location |  | | | |
| Date of Inspection |  | | | |
| Inspection Participants |  | | | |
| **EVALUATION CRITERIA** | | | | |
| The establishment continues the sale and/or distribution of single-use bags, straws, packaging, and/or disposable containers. | YES |  | NO |  |
| The establishment distributes bags for printed advertising. | YES |  | NO |  |
| The establishment uses and/or sells recyclable material. | YES |  | NO |  |
| Observations |  | | | |

Table S2. Plastic Characterization Results

| Ecological Point (EP) | | Phase | Plastic bags (u/day) | Straws (u/day) | Breakfast bottles (u/day) | Beverage bottles (u/day) | Tuppers (kg) |
| --- | --- | --- | --- | --- | --- | --- | --- |
| **EP1** | **Before** | | 96 | 17 | 6 | 11 | 0.434 |
| **After** | | 34 | 12 | 7 | 0 | 0.076 |
| **EP2** | **Before** | | 113 | 6 | 23 | 21 | 0.404 |
| **After** | | 208 | 29 | 24 | 26 | 1.368 |
| **EP3** | **Before** | | 50 | 12 | 9 | 14 | 0 |
| **After** | | 226 | 24 | 32 | 24 | 1.634 |
| **EP4** | **Before** | | 237 | 32 | 8 | 26 | 0.34 |
| **After** | | 340 | 37 | 42 | 33 | 3.23 |
| **EP5** | **Before** | | 134 | 9 | 16 | 18 | 0.4 |
| **After** | | 87 | 4 | 16 | 33 | 2.888 |
| **EP9** | **Before** | | 190 | 33 | 50 | 84 | 0.25 |
| **After** | | 128 | 23 | 27 | 37 | 0.418 |
| **EP10** | **Before** | | 86 | 2 | 10 | 27 | 0.595 |
| **After** | | 35 | 1 | 6 | 34 | 0.152 |
| **EP11** | **Before** | | 119 | 0 | 13 | 67 | 0.356 |
| **After** | | 102 | 7 | 18 | 23 | 1.71 |
| **EP12** | **Before** | | 170 | 6 | 27 | 82 | 0.278 |
| **After** | | 158 | 17 | 54 | 59 | 0.76 |
| **EP14** | **Before** | | 342 | 28 | 43 | 134 | 0.944 |
| **After** | | 130 | 15 | 33 | 60 | 0.57 |
| **EP15** | **Before** | | 249 | 14 | 17 | 69 | 1.692 |
| **After** | | 118 | 17 | 19 | 50 | 0.95 |
| **EP16** | **Before** | | 104 | 10 | 7 | 18 | 0.355 |
| **After** | | 167 | 23 | 18 | 83 | 1.672 |
| **EP18** | **Before** | | 39 | 6 | 6 | 29 | 0.218 |
| **After** | | 73 | 12 | 1 | 12 | 0.456 |
| **EP21** | **Before** | | 175 | 11 | 30 | 48 | 0.817 |
| **After** | | 72 | 17 | 12 | 14 | 0.874 |
| **EP22** | **Before** | | 92 | 6 | 14 | 55 | 1.147 |
| **After** | | 87 | 10 | 14 | 15 | 1.026 |
| **EP23** | **Before** | | 59 | 8 | 18 | 13 | 0.107 |
| **After** | | 117 | 8 | 8 | 9 | 0.304 |
| **EP25** | **Before** | | 204 | 15 | 53 | 83 | 0.136 |
| **After** | | 118 | 7 | 42 | 31 | 0.266 |
| **EP26** | **Before** | | 105 | 4 | 15 | 36 | 0.293 |
| **After** | | 18 | 0 | 5 | 2 | 0 |
| **EP27** | **Before** | | 139 | 11 | 20 | 41 | 0.139 |
| **After** | | 100 | 2 | 30 | 32 | 0.418 |
| **EP28** | **Before** | | 138 | 6 | 29 | 47 | 0.119 |
| **After** | | 160 | 3 | 39 | 48 | 0.304 |
| **EP35** | **Before** | | 59 | 8 | 18 | 10 | 0.105 |
| **After** | | 60 | 0 | 12 | 8 | 0.304 |
| **EP39** | **Before** | | 109 | 8 | 16 | 32 | 0.088 |
| **After** | | 77 | 0 | 30 | 26 | 0.076 |
| **EP40** | **Before** | | 32 | 1 | 5 | 16 | 0.075 |
| **After** | | 43 | 1 | 2 | 8 | 0.114 |
| **EP41** | **Before** | | 63 | 7 | 7 | 25 | 0.162 |
| **After** | | 109 | 13 | 41 | 48 | 0.456 |
| **EP42** | **Before** | | 92 | 3 | 12 | 26 | 0.323 |
| **After** | | 86 | 6 | 18 | 34 | 0.684 |
| **EP43** | **Before** | | 117 | 1 | 27 | 34 | 0.797 |
| **After** | | 106 | 2 | 29 | 51 | 3.42 |
| **EP44** | **Before** | | 161 | 13 | 34 | 54 | 0.48 |
| **After** | | 240 | 12 | 63 | 58 | 1.216 |
| **EP45** | **Before** | | 237 | 12 | 31 | 85 | 1.629 |
| **After** | | 106 | 6 | 39 | 35 | 0.494 |
| **TOTAL** | **Before** | | 3711 | 289 | 564 | 1205 | 12.683 |
| **After** | | 3305 | 308 | 681 | 893 | 25.84 |
